# Supplementary material for: Empirical Comparison and Analysis of Web-Based DNA N4-Methylcytosine Site Prediction Tools
Source: PubMed Central journal article supplement — Mol Ther Nucleic Acids. 2020 Sep 16;22:406–20. doi: 10.1016/j.omtn.2020.09.010 (PMC7533314; doi:10.1016/j.omtn.2020.09.010), 2020-09-16
Supplement: mmc1.pdf [file mmc1.pdf]

OMTN, Volume 22

## **Supplemental Information**

### **Empirical Comparison and Analysis of Web-Based DNA $N^4$ -Methylcytosine Site Prediction Tools**

**Balachandran Manavalan, Md. Mehedi Hasan, Shaherin Basith, Vijayakumar Gosu, Tae-Hwan Shin, and Gwang Lee**

Table S1. Performance of existing predictors on validation set.

| Species                   | Methods      | MCC    | BACC  | Sn    | Sp    | AUC   | TP    | TN     | FN    | FP     | P-value  |
|---------------------------|--------------|--------|-------|-------|-------|-------|-------|--------|-------|--------|----------|
| <i>Geob. pickeringii</i>  | iDNA4mC      | 0.118  | 0.610 | 0.532 | 0.687 | 0.653 | 2364  | 41251  | 2081  | 18754  | —        |
|                           | 4mCPred I    | 0.072  | 0.571 | 0.620 | 0.523 | 0.598 | 2756  | 31363  | 1689  | 28642  | <0.00001 |
|                           | 4mCPred II   | 0.069  | 0.568 | 0.620 | 0.516 | 0.589 | 2756  | 30981  | 1689  | 29024  | <0.00001 |
|                           | 4mCCNN       | -0.008 | 0.492 | 0.507 | 0.478 | 0.492 | 2254  | 28671  | 2191  | 31334  | <0.00001 |
|                           | 4mCPred-SVM  | -0.014 | 0.486 | 0.557 | 0.415 | 0.485 | 2477  | 24932  | 1968  | 35073  | <0.00001 |
|                           | DNA4mC-LIP   | -0.022 | 0.479 | 0.582 | 0.376 | 0.505 | 2585  | 22544  | 1860  | 37461  | <0.00001 |
| <i>E. coli</i>            | Meta-4mCpred | -0.064 | 0.441 | 0.560 | 0.321 | 0.430 | 2491  | 19256  | 1954  | 40749  | <0.00001 |
|                           | 4mCCNN       | 0.110  | 0.793 | 0.781 | 0.805 | 0.873 | 523   | 95232  | 147   | 23034  | —        |
|                           | DNA4mC-LIP   | 0.102  | 0.788 | 0.804 | 0.771 | 0.866 | 539   | 91181  | 131   | 27085  | 0.577254 |
|                           | 4mCPred II   | 0.096  | 0.788 | 0.854 | 0.722 | 0.865 | 572   | 85404  | 98    | 32862  | 0.524711 |
|                           | 4mCPred-SVM  | 0.105  | 0.782 | 0.766 | 0.799 | 0.858 | 513   | 94501  | 157   | 23765  | 0.237642 |
|                           | Meta-4mCpred | 0.094  | 0.771 | 0.791 | 0.751 | 0.842 | 530   | 88854  | 140   | 29412  | 0.016821 |
| <i>C. elegans</i>         | 4mCPred I    | 0.097  | 0.768 | 0.757 | 0.780 | 0.842 | 507   | 92264  | 163   | 26002  | 0.016821 |
|                           | iDNA4mC      | 0.056  | 0.668 | 0.622 | 0.714 | 0.728 | 417   | 84467  | 253   | 33799  | <0.00001 |
|                           | DNA4mC-LIP   | 0.478  | 0.825 | 0.832 | 0.817 | 0.900 | 16049 | 118144 | 3240  | 26409  | —        |
|                           | 4mCCNN       | 0.486  | 0.824 | 0.815 | 0.832 | 0.904 | 15730 | 120310 | 3559  | 24243  | 0.58093  |
|                           | 4mCPred II   | 0.453  | 0.820 | 0.859 | 0.781 | 0.898 | 16567 | 112949 | 2722  | 31604  | 0.349634 |
|                           | 4mCPred I    | 0.474  | 0.819 | 0.815 | 0.824 | 0.892 | 15721 | 119041 | 3568  | 25512  | 0.00022  |
| <i>A. thaliana</i>        | 4mCPred-SVM  | 0.405  | 0.781 | 0.770 | 0.791 | 0.858 | 14851 | 114355 | 4438  | 30198  | <0.00001 |
|                           | iDNA4mC      | 0.401  | 0.775 | 0.751 | 0.799 | 0.854 | 14491 | 115436 | 4798  | 29117  | <0.00001 |
|                           | Meta-4mCpred | 0.376  | 0.763 | 0.750 | 0.777 | 0.822 | 14459 | 112343 | 4830  | 32210  | <0.00001 |
|                           | DNA4mC-LIP   | 0.561  | 0.796 | 0.778 | 0.813 | 0.868 | 57432 | 145362 | 16353 | 33349  | —        |
|                           | 4mCPred I    | 0.528  | 0.780 | 0.767 | 0.794 | 0.852 | 56574 | 141902 | 17211 | 36809  | <0.00001 |
|                           | 4mCPred II   | 0.520  | 0.776 | 0.758 | 0.794 | 0.849 | 55924 | 141813 | 17861 | 36898  | <0.00001 |
| <i>D. melanogaster</i>    | 4mCCNN       | 0.513  | 0.772 | 0.756 | 0.788 | 0.844 | 55815 | 140847 | 17970 | 37864  | <0.00001 |
|                           | Meta-4mCpred | 0.515  | 0.771 | 0.740 | 0.803 | 0.844 | 54581 | 143445 | 19204 | 35266  | <0.00001 |
|                           | 4mCPred-SVM  | 0.509  | 0.770 | 0.754 | 0.786 | 0.843 | 55658 | 140554 | 18127 | 38157  | <0.00001 |
|                           | iDNA4mC      | 0.220  | 0.609 | 0.439 | 0.779 | 0.672 | 32416 | 139291 | 41369 | 39420  | <0.00001 |
|                           | 4mCCNN       | 0.515  | 0.822 | 0.885 | 0.758 | 0.895 | 40549 | 159036 | 5260  | 50654  | —        |
|                           | DNA4mC-LIP   | 0.498  | 0.817 | 0.913 | 0.721 | 0.896 | 41818 | 151282 | 3991  | 58408  | 0.481122 |
| <i>Geoa. subterraneus</i> | 4mCPred I    | 0.490  | 0.809 | 0.883 | 0.735 | 0.885 | 40450 | 154175 | 5359  | 55515  | <0.00001 |
|                           | Meta-4mCpred | 0.477  | 0.803 | 0.884 | 0.722 | 0.862 | 40479 | 151326 | 5330  | 58364  | <0.00001 |
|                           | 4mCPred II   | 0.449  | 0.790 | 0.908 | 0.672 | 0.864 | 41585 | 140817 | 4224  | 68873  | <0.00001 |
|                           | 4mCPred-SVM  | 0.463  | 0.793 | 0.868 | 0.719 | 0.867 | 39748 | 150831 | 6061  | 58859  | <0.00001 |
|                           | iDNA4mC      | 0.238  | 0.643 | 0.542 | 0.745 | 0.712 | 24819 | 156122 | 20990 | 53568  | <0.00001 |
|                           | 4mCCNN       | 0.150  | 0.575 | 0.449 | 0.701 | 0.611 | 7885  | 7999   | 9688  | 3405   | —        |
| <i>M. musculus</i>        | 4mCPred II   | 0.097  | 0.549 | 0.604 | 0.495 | 0.574 | 10612 | 5642   | 6961  | 5762   | <0.00001 |
|                           | 4mCCNN       | 0.087  | 0.545 | 0.553 | 0.536 | 0.555 | 9724  | 6109   | 7849  | 5295   | <0.00001 |
|                           | DNA4mC-LIP   | 0.076  | 0.539 | 0.568 | 0.510 | 0.551 | 9978  | 5814   | 7595  | 5590   | <0.00001 |
|                           | 4mCPred I    | 0.070  | 0.536 | 0.591 | 0.481 | 0.557 | 10383 | 5482   | 7190  | 5922   | <0.00001 |
|                           | 4mCPred-SVM  | 0.069  | 0.535 | 0.571 | 0.500 | 0.546 | 10031 | 5702   | 7542  | 5702   | <0.00001 |
|                           | Meta-4mCpred | 0.043  | 0.522 | 0.574 | 0.469 | 0.524 | 10094 | 5352   | 7479  | 6052   | <0.00001 |
| <i>F. vesca</i>           | i4mC-Mouse   | 0.020  | 0.578 | 0.808 | 0.348 | 0.633 | 761   | 86181  | 181   | 161642 | —        |
|                           | 4mCpred-EL   | 0.018  | 0.571 | 0.773 | 0.370 | 0.612 | 728   | 91703  | 214   | 156120 | 0.129443 |
| <i>F. vesca</i>           | iDNA-MS      | 0.417  | 0.847 | 0.876 | 0.818 | 0.930 | 18710 | 238038 | 2640  | 52819  | —        |
|                           | i4mC-ROSE    | 0.386  | 0.802 | 0.758 | 0.847 | 0.889 | 16179 | 246439 | 5171  | 44417  | <0.00001 |

The first and second column respectively represent the species and method names. Methods are ranked according to its BACC for each species. The top method AUC value is compared with other methods and computed the *P*-value using two-tailed test. MCC: Matthews correlation coefficient; ACC: accuracy; Sn: sensitivity; Sp: specificity. If the value is not provided in the literature, it is mentioned as ‘—’.
